# Supplementary material for: A bit or a lot on the side? Observational study of the energy content of starters, sides and desserts in major UK restaurant chains
Source: PubMed Central journal article supplement (PMC6797243; doi:10.1136/bmjopen-2019-029679), 2019-10-07
Supplement: bmjopen-2019-029679.draft_revisions.pdf [file bmjopen-2019-029679.draft_revisions.pdf]

# BMJ Open

BMJ Open is committed to open peer review. As part of this commitment we make the peer review history of every article we publish publicly available.

When an article is published we post the peer reviewers' comments and the authors' responses online. We also post the versions of the paper that were used during peer review. These are the versions that the peer review comments apply to.

The versions of the paper that follow are the versions that were submitted during the peer review process. They are not the versions of record or the final published versions. They should not be cited or distributed as the published version of this manuscript.

BMJ Open is an open access journal and the full, final, typeset and author-corrected version of record of the manuscript is available on our site with no access controls, subscription charges or pay-per-view fees (<http://bmjopen.bmj.com>).

If you have any questions on BMJ Open's open peer review process please email [info.bmjopen@bmj.com](mailto:info.bmjopen@bmj.com)

# BMJ Open

## **A bit or a lot on the side? An observational study of the energy content of starters, sides and desserts in major UK restaurant chains**

|                               |                                                                                                                                                                                                                                                                                                                                                                                                                                                                                                                               |
|-------------------------------|-------------------------------------------------------------------------------------------------------------------------------------------------------------------------------------------------------------------------------------------------------------------------------------------------------------------------------------------------------------------------------------------------------------------------------------------------------------------------------------------------------------------------------|
| Journal:                      | <i>BMJ Open</i>                                                                                                                                                                                                                                                                                                                                                                                                                                                                                                               |
| Manuscript ID                 | bmjopen-2019-029679                                                                                                                                                                                                                                                                                                                                                                                                                                                                                                           |
| Article Type:                 | Research                                                                                                                                                                                                                                                                                                                                                                                                                                                                                                                      |
| Date Submitted by the Author: | 05-Feb-2019                                                                                                                                                                                                                                                                                                                                                                                                                                                                                                                   |
| Complete List of Authors:     | Muc, Magdalena; University of Liverpool, Department of Psychological Sciences<br>Jones, Andrew; University of Liverpool, Department of Psychological Sciences<br>Roberts, Carl; Institute of Psychology, Health and Society, University of Liverpool, UK, Department of Psychological Sciences,<br>Sheen, Florence; University of Liverpool<br>Haynes, Ashleigh ; University of Liverpool<br>Robinson, Eric ; Institute of Psychology, Health and Society, University of Liverpool, UK, Department of Psychological Sciences, |
| Keywords:                     | food environment, eating out, restaurant food, kilocalories, obesity                                                                                                                                                                                                                                                                                                                                                                                                                                                          |
|                               |                                                                                                                                                                                                                                                                                                                                                                                                                                                                                                                               |

SCHOLARONE™  
Manuscripts

1  
2  
3  
4 1 A bit or a lot on the side? An observational study of the  
5  
6  
7 2 energy content of starters, sides and desserts in major UK  
8  
9  
10 3 restaurant chains  
11  
12  
13  
14  
15 4  
16  
17  
18  
19 5  
20  
21 6  
22

23 7 Magdalena Muc<sup>1</sup>, Andrew Jones<sup>1</sup>, Carl Alexander Roberts<sup>1</sup>, Florence Sheen<sup>1</sup>, Ashleigh  
24  
25 8 Haynes<sup>1</sup> & Eric Robinson<sup>1</sup>  
26  
27  
28 9

30 10 <sup>1</sup> Department of Psychological Sciences, University of Liverpool, L69 7ZA, UK  
31  
32 11

34 12 Correspondence: Eric Robinson, Department of Psychological Sciences, University of  
35  
36  
37 13 Liverpool, L69 7ZA, UK. Email: [eric.robinson@liv.ac.uk](mailto:eric.robinson@liv.ac.uk)  
38

39 14 Magdalena Muc, Institute of Psychology, Health & Society, University of Liverpool, L69 7ZA,  
40  
41 15 UK. Email: [mmuc@liverpool.ac.uk](mailto:mmuc@liverpool.ac.uk)  
42  
43  
44 16  
45  
46 17  
47  
48 18  
49

50 19 **Total word count:** 3068  
51

53 20 **Key words:** food environment; eating out; restaurant food; kilocalories; obesity  
54  
55  
56 21  
57  
58  
59  
60

1  
2  
3 22 **Abstract**

4  
5 23 Objectives: Main meals served by UK restaurants often have an excessive energy content, but  
6  
7 24 the energy content of other menu sections has not been examined. Our objective was to  
8  
9 25 examine the kilocalorie (kcal) content of starter, side and dessert dishes served in major UK  
10  
11 26 restaurant chains, comparing the kcal content of these dishes in fast-food and full-service  
12  
13  
14 27 restaurants.

15  
16 28 Design: Observational study.

17  
18 29 Setting: Menu and nutritional information provided online by major UK restaurant chains.

19  
20 30 Method: During October to November 2018, we accessed websites of restaurant chains with  
21  
22 31 50 or more outlets in the UK. Menu items that constituted starter, side or dessert dishes were  
23  
24 32 identified and the kcal content of these dishes was extracted. Any accompanying beverage  
25  
26 33 kcals were not included.

27  
28 34 Main outcome measures: The mean kcal content of dishes and the proportion of dishes  
29  
30 35 exceeding public health recommendations for energy content in a main meal (>600kcal).

31  
32 36 Results: A total of 1009 dishes (212 starters, 317 sides and 480 desserts) from 27 restaurant  
33  
34 37 chains (21 full-service, 6 fast-food) were included. The mean kcal content of eligible dishes  
35  
36 38 was 477.0 (SE=25.9) for starters, 321.5 (SE=20.3) for sides and 488.4 (SE=35.05) for  
37  
38 39 desserts. The percentage of dishes which exceeded 600kcal was 26.4% for starters, 21.8%  
39  
40 40 for sides and 20.4% for desserts. Compared to fast-food chains, desserts offered at full  
41  
42 41 service restaurants were on average more calorific and were significantly more likely to  
43  
44 42 exceed 600kcal.

45  
46 43 Conclusions: The average energy content of sides, starters and desserts sold in major UK  
47  
48 44 restaurants is high. One in four starters and one in five sides and desserts in UK chain  
49  
50 45 restaurants exceed the recommended energy intake for an entire meal.

51  
52 46  
53  
54  
55  
56  
57  
58  
59  
60

1  
2  
3 47 **Strengths and limitations of this study**  
4

- 5 48 • This is the first study of which we are aware to assess the energy content of starter,  
6  
7 side and dessert dishes in the UK eating out sector.  
8 49  
9  
10 50 • Our findings will be of use to future evaluations of how the out of home food sector  
11  
12 respond to voluntary or mandatory public health actions through food product  
13 51  
14 reformulation.  
15 52  
16  
17 53 • Smaller chains and independent restaurants were not included, however there is  
18  
19 evidence that both chain and non-chain restaurants tend to serve highly calorific foods  
20 54  
21  
22 55 • We could only use the nutrition data that restaurants made available, which excluded  
23  
24 several dishes from our analyses.  
25 56  
26  
27  
28  
29  
30  
31  
32  
33  
34  
35  
36  
37  
38  
39  
40  
41  
42  
43  
44  
45  
46  
47  
48  
49  
50  
51  
52  
53  
54  
55  
56  
57  
58  
59  
60

## Introduction

Overweight and obesity are now common in most of the developed world. For example, in the UK two in three adults and one in three children are now classed as being overweight or obese<sup>1</sup>. Although obesity is a multifactorial disease, it is clear that changes to the food environment has been a key factor driving the global obesity epidemic<sup>2,3</sup>. Eating out of the home is becoming increasingly common, with 39% of adults reporting eating out at least once a week in a recent UK study<sup>4</sup>. Eating out of the home is associated with higher energy consumption and research suggests that frequently eating out of the home is a risk factor for obesity<sup>5</sup>. The consumption of 'fast-food' meals has been widely identified as a cause for concern, due to the low nutritional quality and high energy content of meals served in these restaurants<sup>6</sup>. Because of this, the out of home food sector has now been identified as an area for public health policy intervention in the US<sup>7</sup> and UK government are currently considering similar policy action<sup>8</sup>. However, most of the research on the nutritional quality of food eaten out of the home has been conducted in North America, a region with a particularly high prevalence of obesity<sup>6,9,10</sup>. There has been little research examining the nutritional quality of food sold out of the home in the UK, although a small study of meals sold in independent small scale takeaway outlets has shown that energy content can be excessive<sup>11</sup>. In a recent study we examined the kilocalorie content of main meals sold by major restaurant chains in the UK<sup>12</sup>. We found that the average kilocalorie content of main meals was high and very few meals adhered to public health recommendations for main meal kilocalorie consumption ( $\leq 600$ kcal) recently suggested by Public Health England<sup>13</sup>. Moreover, we found that main meals sold by full-service restaurants tended to be more calorific than those sold by fast-food restaurants, which is consistent with data from North American restaurants<sup>14</sup>. However, previous research has focused on main meal dishes and as consumers regularly order starters, sides and/or desserts as part of their meal out of the home,

1  
2  
3 82 the aims of the present study were to assess the average energy content of starter, side and  
4  
5 83 dessert dishes sold in major UK restaurant chains. Based on <sup>12</sup> Robinson et al. (2018), we also  
6  
7 84 examined how common it was for starter, side and desserts dishes to exceed the amount of  
8  
9 85 calories recommended for an entire meal whether these dishes would be more calorific at  
10  
11 86 full-service, as opposed to fast-food restaurants.  
12  
13  
14

## 15 87 **Methods**

16  
17 88 We pre-registered the study protocol and analysis plan on the Open Science Framework  
18  
19 89 (<https://osf.io/6cfdb/>)  
20  
21

22 90 *Restaurant sampling.* Previously <sup>12</sup> we identified restaurant chains with  $\geq 50$  outlets in the  
23  
24 91 UK by consulting market reports listing restaurants with the largest number of UK outlets,  
25  
26 92 and market research ranking UK restaurant chains by annual turnover, popularity, number of  
27  
28 93 users, and numbers of outlets <sup>15-18</sup>. If the number of UK outlets was not provided on a  
29  
30 94 restaurant website, this information was requested by email.  
31  
32

33 95 *Characterising restaurant types.* As in <sup>12</sup> we classified restaurant chains as ‘fast-food’ or  
34  
35 96 ‘full-service’ restaurants using the following definition of fast-food restaurants: ‘*Restaurants*  
36  
37 97 *that primarily provide consumers with largely pre-prepared ‘quick’ meals with little or no*  
38  
39 98 *table service, with in-store seating and in which take-away orders are likely to account for a*  
40  
41 99 *significant proportion of orders*’. Therefore, coffee shops and take-away only outlets were  
42  
43 100 not considered eligible. Previously two researchers independently categorised each of the  
44  
45 101 included restaurant as fast-food or full-service with any disagreements resolved by a third  
46  
47 102 researcher <sup>12</sup>.  
48  
49

50  
51 103 *Data sources.* To access current menus and nutritional information, two researchers visited  
52  
53 104 the restaurants’ UK web pages during October and November 2018 and accessed online  
54  
55 105 versions of current menus. If a restaurant only had a downloadable menu (PDF), and no  
56  
57 106 website menu, we used the former. If there were several menus (e.g. specials menus), only  
58  
59  
60

1  
2  
3 107 the 'main menu' was used for coding. If there was no menu clearly labelled as the 'main'  
4  
5 108 menu then we used the restaurant's 'evening menu'.  
6  
7  
8 109 *Starters, sides, desserts menu options.* We examined the kcal content of starters, sides and  
9  
10 110 dessert menu options. We defined a starter/side/dessert item as being a menu option that is  
11  
12 111 not a main meal dish, is an individually sold food item and can be ordered on its own, as  
13  
14 112 opposed to a more specific addition to a menu item (e.g. steak sauce, ice cream toppings). We  
15  
16 113 excluded menu items that could not be ordered by all consumers (e.g. items from senior  
17  
18 114 citizens menu section, children's menu section) and excluded platters and sharers (unless the  
19  
20 115 menu indicated the number of people per serving) as we could not confidently identify what  
21  
22 116 combination of sharing menu options would constitute a starter, side or dessert for one  
23  
24 117 person. Small plates (tapas) were not eligible unless they were part of a section of the menu  
25  
26 118 that was labelled as starters, side dishes or desserts. We also excluded menu items with  
27  
28 119 unspecified portion size, such as "unlimited" or "bottomless" options as we would not be able  
29  
30 120 to calculate energy content. In instances in which a menu option could be customized at the  
31  
32 121 request of the patron for an additional charge (for example add extra toppings), we only  
33  
34 122 extracted the default composition of the menu option. In instances in which a menu option  
35  
36 123 required a customer to make an explicit choice (e.g. choice of topping for a starter or dessert  
37  
38 124 accompaniment), we identified all possible configurations for the item and record each as an  
39  
40 125 individual menu item (e.g. chocolate cake with ice cream, chocolate cake with custard) If a  
41  
42 126 menu item appeared on the menu as served with a drink of choice, we excluded it as a  
43  
44 127 scoping exercise indicated that this was uncommon and our focus is on energy content of  
45  
46 128 food items. Finally, to minimize effects of season, we only included options that were  
47  
48 129 available all year round and/or not sold everyday (e.g. only on specific days, such as 'soup of  
49  
50 130 the day').  
51  
52  
53  
54  
55  
56  
57  
58  
59  
60



1  
2  
3 131 Two researchers (F.S and C.A.R) independently identified menu options from each restaurant  
4  
5 132 and a third researcher (M.M) checked their eligibility according to the protocol and resolved  
6  
7  
8 133 any discrepancies. As there was a very high number of menu sections that were not eligible  
9  
10 134 (e.g. main meals, sharers, drinks, children's menu, Sunday menu) coders did not record a  
11  
12 135 classification (eligible vs. not eligible) for every item on each menu. As in (12) we used an  
13  
14 136 approximated inter-coder consistency by calculating the number of menu items deemed  
15  
16 137 eligible by both coders vs. the number of menu items included by only one of the coders.  
17  
18  
19 138 *Extraction of dish kcal content.* As above F.S and C.A.R accessed the online nutritional  
20  
21 139 information for each restaurant (October 2018) and extracted the number of kcals per menu  
22  
23 140 item. M.M cross-checked kcal extraction for accuracy.  
24  
25

## 26 141 **Statistical analysis**

27  
28 142 *Primary analyses – average number of kcals:* Menu items were nested within individual  
29  
30 143 restaurants so we planned to use multi-level analyses. We first examined if a multi-level  
31  
32 144 analysis was appropriate for starters, sides and dessert kcals separately by examining the  
33  
34 145 portioning of variance attributed to differences in kcals between restaurants (between  
35  
36 146 restaurant variance/(between restaurant variance + within restaurant variance)). We examined  
37  
38 147 the multilevel model fit by comparing the loglikelihood ratio statistic (loglikelihood of the  
39  
40 148 multilevel model - loglikelihood of the single-level model) to a chi-squared distribution with  
41  
42 149 1 degree of freedom. We used bootstrapping (500 samples) to improve the accuracy of  
43  
44 150 parameter values and reduce bias in parameter estimates. Statistical significance ( $p < .05$ )  
45  
46 151 indicated meaningful variation in kcals of menu items between restaurants and a multilevel  
47  
48 152 model was used. In all statistical tests  $\alpha$  was set at .05 and we report 95% confidence intervals  
49  
50 153 for significance testing. Where multilevel modelling was not appropriate we used  
51  
52 154 conventional frequentist statistics, maintaining  $p < .05$  as the level of statistical significance.  
53  
54  
55  
56  
57  
58  
59  
60

1  
2  
3 155 *Secondary analyses.* Public Health England recommends that adults do not exceed 600kcal  
4  
5 156 for a complete meal at lunch and dinner (8). There are no specific recommendations for  
6  
7 157 individual components (e.g. energy from sides) of a meal, so we examined how common it  
8  
9 158 was for starters, sides and desserts to be excessive in kcal content by calculating the  
10  
11 159 proportion of menu items that exceed an entire meal's worth of kcal (600kcal). We  
12  
13 160 examined differences between the two restaurant types (fast-food vs. full-service) by using  
14  
15 161 one-level binary logistic regressions. Because variability in menu item kcal content between  
16  
17 162 restaurant types may be in part explained by the two types of restaurant serving different  
18  
19 163 types of dishes, we examined whether there were dishes that were routinely sold by both  
20  
21 164 types of restaurant (e.g. side of fries/chips, salad) and we compared the average number of  
22  
23 165 kcal for these dish types by restaurant type.  
24  
25  
26  
27  
28  
29  
30

## 31 167 **Results**

32  
33 168 *Restaurants.* Fifty-two eligible restaurant chains were identified and of these 30 restaurants  
34  
35 169 had available menus and nutritional information. We requested this from the remaining  
36  
37 170 chains but only one provided this information. Because we examined main meal  
38  
39 171 accompaniments (starters, sides, desserts) we excluded four restaurants that only tended to  
40  
41 172 sell individual food items that customers choose from to form a meal (e.g. pieces of chicken,  
42  
43 173 pieces of sushi) leaving 27 restaurants in the final sample (n=6 fast-food, n=21 full-service  
44  
45 174 restaurants). See Table 1 for restaurants included.  
46  
47  
48

49 175 *Menu items.* Of all the menu items identified by either of two coders (1494), the first coder  
50  
51 176 identified 74 items which were not identified by the second coder (95.1% agreement) and the  
52  
53 177 second coder identified 35 items not identified by the first coder (97.7% agreement),  
54  
55 178 indicating reasonable consistency between the two coders in identifying eligible dishes. The  
56  
57 179 items in disagreement were then reviewed by a third researcher and after these discrepancies  
58  
59  
60

1  
2  
3 180 were resolved, the final number of eligible dishes was 1361. We were able to extract kcal  
4  
5 181 information for 1009 dishes (74.1% of eligible items) and the remaining dishes were treated  
6  
7  
8 182 as missing data and not included in analyses. See Table 1 for number of eligible dishes per  
9  
10 183 restaurant.

11  
12 184 *Mean kcal content of menu items (Table 1).* For all three groups (starters, sides and desserts)  
13  
14 185 two-level model (dishes within restaurants) was a better fit of the data than a single level  
15  
16  
17 186 model. The variance partition coefficient; the total residual variance which is attributable to  
18  
19 187 restaurants rather than individual dishes was 14.7% (model fit:  $\chi^2(1) = 18.14, p < .001$ ) for  
20  
21 188 starters, 51.8% (model fit:  $\chi^2(1) = 123.41, p < .001$ ) for sides, and 45.1% (model fit:  $\chi^2(1) =$   
22  
23 189 198.08,  $p < .001$ ) for desserts, indicating that multi-level modelling was appropriate. In a  
24  
25  
26 190 two-level model (individual dishes nested within restaurants), the average number of kcals  
27  
28 191 for starters was 477.0 (SE=25.9), for sides was 321.5 (SE=20.3) and for desserts was 488.4  
29  
30 192 (SE=35.05).

31  
32  
33 193 Next, we compared the average number of kcal in sides and in desserts between fast-food and  
34  
35 194 full-service restaurants, as there were no starters identified in the fast-food restaurants. Type  
36  
37  
38 195 of restaurant (fast-food vs. full-service) was not a significant predictor of kcal content for  
39  
40 196 sides,  $\beta = 3.19, SE = 11.84$  (95% CIs -20.02 to 26.40),  $p = .79$ ) indicating that sides offered at  
41  
42 197 fast-food restaurants had on average only 3.19 kcals more energy than sides from fast-food  
43  
44 198 restaurants. Desserts had on average 249.47 more kcal in full-service than in fast-food chains  
45  
46  
47 199 ( $\beta = 249.47, SE = 69.74$  (95% CIs 112.78 to 386.16),  $p = .001$ ) and this difference was  
48  
49 200 statistically significant.

50  
51 201 *Mean kcal content of specific dish types (Table 2).* The most common side dish available was  
52  
53 202 chips/fries. To compare the average kcal content of chips between the fast-food and full-  
54  
55  
56 203 service restaurants we selected only chips/fries menu options that were plain, with no sauces  
57  
58 204 or spices, toppings or extras and were served as sides. That resulted in inclusion of 40 menu  
59  
60

1  
2  
3 205 items, offered in 20 restaurants (out of the 27), including five out of six fast-food chains  
4  
5 206 (n=13 items), and 15 out of 21 full-service chains (n=27 items). The small number of items  
6  
7 207 eligible for this sub-analysis did not lend itself to multilevel analysis so we used a t-test to  
8  
9 208 compare the types of restaurants. The average number of kcals was 461.6 (SE=37.8) across  
10  
11 209 all restaurants. Chips/fries in full-service restaurants had on average 226.2kcal more energy  
12  
13 210 than in fast-food restaurants (535.1kcal vs 308.9kcal) and the type of restaurant (full-service  
14  
15 211 vs. fast-food) was a significant predictor ( $p < .01$ ). Ice-cream dishes were the most frequently  
16  
17 212 served dessert across restaurants. We selected only ice-creams made of dairy cream, therefore  
18  
19 213 items such as sorbets, vegan ice creams, and other desserts that included ice-cream (such as  
20  
21 214 cake with ice cream) were excluded from the comparison. Ice-creams were served in 19 out  
22  
23 215 of 27 restaurants (4 of 6 fast-foods and 15 of 21 full-service), with a total of 128 items (24 in  
24  
25 216 fast foods and 104 in full-service). The average amount of kcals in ice-cream dishes was  
26  
27 217 383.4 (SE=23.7). Full-service restaurant ice-cream dishes had on average 178.3 kcals more  
28  
29 218 than fast-food ice-cream dishes (416.8kcal vs. 238.5kcal) and this difference was statistically  
30  
31 219 significant ( $p < .01$ ).

32  
33 220 *Menu items >600kcal.* Of the 212 starters identified, 56 (26.4%) exceeded 600kcal per dish  
34  
35 221 and all starter dishes were from full-service restaurants. Of the 317 side dishes, 69 (21.8%)  
36  
37 222 had >600kcal. Logistic regression models examining proportion of dishes >600kcal  
38  
39 223 demonstrated significant variance at the restaurant level (Wald Test Statistic = 8.81,  $p =$   
40  
41 224 .003). The proportion of sides >600kcal was not significantly larger in sit down restaurants  
42  
43 225 compared to fast food restaurants (OR = 0.98 (95% CIs: 0.14 to 6.55,  $p = .982$ ). Among the  
44  
45 226 480 identified desserts, 98 (20.4%) exceeded 600kcal. Logistic regression models  
46  
47 227 examining proportion of dishes >600kcal demonstrated significant variance at the restaurant  
48  
49 228 level (Wald Test Statistic = 7.68,  $p = .006$ ). The proportion of desserts exceeding the 600kcal  
50  
51  
52  
53  
54  
55  
56  
57  
58  
59  
60

1  
2  
3 229 was 13.7 times larger in sit-down compared to fast food restaurants (OR = 13.69: 95% CIs  
4  
5 230 2.27 to 83.10,  $p = .001$ ).  
6  
7  
8

9 231

10  
11 232

## Discussion

12  
13 233 The present study examined the energy content of starter, side and dessert dishes sold by  
14  
15 234 major UK restaurant chains. We found that the average number of kilocalories in starter  
16  
17 235 dishes, side dishes and dessert dishes was 477, 322 and 488 kilocalories respectively. We also  
18  
19 236 examined the proportion of these dishes that we deemed to be ‘excessive’ by identifying  
20  
21 237 those with more than 600 kilocalories; the recommended kilocalorie content of a full lunch or  
22  
23 238 dinner meal in the UK <sup>19</sup>. We identified that one in four starters and one in five sides and  
24  
25 239 desserts exceeded the amount of energy recommended for a full meal. Results also indicated  
26  
27 240 that kilocalorie content of dishes was associated with restaurant type. When comparing types  
28  
29 241 of restaurants, we found that desserts were significantly higher in kilocalories in full-service  
30  
31 242 vs. fast-food restaurants.  
32  
33  
34  
35

36 243

37  
38 244 Our results are in line with studies that have examined the energy content of North American  
39  
40 245 restaurant food and a recent UK study <sup>10,12,14,20,21</sup>. Based on these results, the average energy  
41  
42 246 content of a three-course meal (starter, main meal, dessert) in a major chain restaurant in the  
43  
44 247 UK would be approximately 1,787 kilocalories, which equates to close to three times the  
45  
46 248 recommended energy intake for a main meal, and 89% of the recommended daily  
47  
48 249 consumption of kilocalories for women or 71% for men. Although individual energy  
49  
50 250 requirements vary according to levels of physical activity, age, gender, and body mass,  
51  
52 251 frequent eating out of home combined with the relatively high energy content of restaurant  
53  
54 252 dishes (including starters, sides and desserts) may contribute to excessive energy intake that  
55  
56 253 is now common in the UK and other high-income countries. The present research has  
57  
58  
59  
60

1  
2  
3 254 relevance to public health policy and our results also suggest that policy actions which result  
4  
5 255 in the reduction of the energy content of restaurant food are urgently needed. In September  
6  
7 256 2018, the UK government launched an open consultation on kilocalorie labelling for food and  
8  
9 257 drink served outside of the home. As our study shows, starters, sides and desserts can be  
10  
11 258 highly calorific and, in some cases, exceed the amount of energy recommended for a single  
12  
13 259 meal. We also found a high degree of variability in kilocalorie content in similar dishes  
14  
15 260 across restaurants, which may make it difficult for consumers to estimate energy content  
16  
17 261 without access to nutritional information. For example, the most calorific portion of  
18  
19 262 chips/fries offered in studied restaurant chains had nearly 12 times more than the least  
20  
21 263 calorific (107kcal and 1256kcal) and it was common for ice-cream desserts to vary  
22  
23 264 dramatically in kilocalorie content. Therefore, mandatory kilocalorie labelling in the UK out  
24  
25 265 of home food sector would be appropriate. The present study is the first of which we are  
26  
27 266 aware of that assesses the energy content of starter, side and dessert dishes in the UK eating  
28  
29 267 out sector, these and the results may be of use to future evaluations of how the out of home  
30  
31 268 food sector respond to voluntary or mandatory public health actions through food product  
32  
33 269 reformulation.  
34  
35  
36  
37  
38  
39  
40  
41

#### 42 271 *Limitations*

43  
44 272 The main limitation of our study was that we were unable to include smaller chains or  
45  
46 273 independent restaurants, however the evidence from US suggest that both chain and non-  
47  
48 274 chain restaurants tend to serve highly calorific foods <sup>10</sup>. As there are no guidelines for the  
49  
50 275 limits of calories in different courses of the meal, we examined the proportion of meals  
51  
52 276 exceeding Public Health England's recommendation of 600 kcals or less per entire meal  
53  
54 277 (lunch or dinner). A further limitation of the study was that we were only able to make use of  
55  
56 278 nutrition data from restaurants that made this information available, which excluded several  
57  
58  
59  
60

1  
2  
3 279 dishes from our analyses. This presents a potential source of bias if the kilocalorie content of  
4  
5 280 restaurants that do not provide nutrition information differs to that of restaurants that do. It is  
6  
7  
8 281 also possible that restaurant-provided nutrition information is inaccurate, although research  
9  
10 282 suggests that it is unlikely<sup>22</sup>.

11  
12 283

### 14 284 *Conclusions*

16  
17 285 The energy content of sides, starters and desserts sold in major UK restaurants is high. One in  
18  
19 286 four starters and one in five sides and desserts in UK chain restaurants exceed the  
20  
21 287 recommended energy intake for an entire meal.

### 25 288 **Data Sharing**

26  
27  
28 289 The final data sets containing restaurant dishes' descriptions and number of kcals for each  
29  
30 290 restaurant used in analyses are available online at <https://osf.io/cd597/>

31  
32  
33  
34 291

### 37 292 **Funding**

38  
39  
40  
41 293 The MRC (MR/N00218/1) part fund ER's salary. The views expressed in this publication are  
42  
43 294 those of the authors and not necessarily those of the MRC.

44  
45  
46  
47 295

### 50 296 **Competing interests**

51  
52  
53  
54 297 All authors have completed the ICMJE uniform disclosure form at  
55  
56 298 [www.icmje.org/coi\\_disclosure.pdf](http://www.icmje.org/coi_disclosure.pdf). ER has been a named investigator on research projects

1  
2  
3 299 funded by the American Beverage Association but does not consider this funding a conflict of  
4  
5 300 interest.  
6  
7  
8

9 301

10  
11  
12 302 **Author statement and Contribution**  
13  
14

15  
16 303 ER and MM designed the study. MM, CR, FS contributed to data collection. AH provided an  
17  
18 304 advice and expertise at all stages and helped solving eligibility disagreements. AJ and MM  
19  
20 305 were responsible for data analysis. MM was responsible for initial drafting of the paper and  
21  
22 306 all authors approved the manuscript and had full access to the data.  
23  
24

25 307

26  
27 308 **Ethical approval**  
28

29 309 As the study involved no human or animal participants and made use of publicly available  
30  
31 310 information ethical approval was not required  
32  
33

34 311

35  
36 312 **Transparency**  
37

38  
39 313 MM acts as the guarantor for this work and confirms that the manuscript is an accurate,  
40  
41 314 transparent and honest account of the study, that no important aspects of the study have been  
42  
43 315 omitted and that any discrepancies from the study as planned have been explained.  
44  
45

46 316

47  
48 317 **References**  
49

- 50  
51 318 1. Health matters: obesity and the food environment. 2018.  
52  
53 319 [https://www.gov.uk/government/publications/health-matters-obesity-and-the-food-](https://www.gov.uk/government/publications/health-matters-obesity-and-the-food-environment/health-matters-obesity-and-the-food-environment--2)  
54  
55 320 [environment/health-matters-obesity-and-the-food-environment--2.](https://www.gov.uk/government/publications/health-matters-obesity-and-the-food-environment/health-matters-obesity-and-the-food-environment--2)  
56  
57  
58  
59  
60



- 1  
2  
3 321 2. Livingstone MBE, Pourshahidi LK. Portion Size and Obesity. *Adv Nutr* 2014; **5**(6):  
4  
5 322 829-34.
- 6  
7  
8 323 3. MacKay S. Legislative solutions to unhealthy eating and obesity in Australia. *Public*  
9  
10 324 *Health* 2011; **125**(12): 896-904.
- 11  
12 325 4. Adams J, Goffe L, Brown T, et al. Frequency and socio-demographic correlates of  
13  
14 326 eating meals out and take-away meals at home: cross-sectional analysis of the UK national  
15  
16 327 diet and nutrition survey, waves 1–4 (2008–12). *Int J Behav Nutr Phys Act* 2015; **12**(1): 51.
- 17  
18  
19 328 5. Bowman SA, Vinyard BT. Fast Food Consumption of U.S. Adults: Impact on Energy  
20  
21 329 and Nutrient Intakes and Overweight Status: *J Am Coll Nutr*. 23 (2) (pp 163-168), 2004. Date  
22  
23 330 of Publication: April 2004.; 2004.
- 24  
25  
26 331 6. Bauer KW, Hearst MO, Earnest AA, French SA, Oakes JM, Harnack LJ. Energy  
27  
28 332 content of U.S. fast-food restaurant offerings: 14-year trends. *Am J Prev Med* 2012; **43**(5):  
29  
30 333 490-7.
- 31  
32  
33 334 7. Rubin R. Will Posting Nutritional Information on Menus Prod Diners to Make  
34  
35 335 Healthier Choices? *JAMA* 2018; **319**(19): 1969-71.
- 36  
37  
38 336 8. Calorie labelling for food and drink served outside of the home. 2018.  
39  
40 337 <https://www.gov.uk/government/consultations/calorie-labelling-for-food-and-drink-served->  
41  
42 338 [outside-of-the-home](https://www.gov.uk/government/consultations/calorie-labelling-for-food-and-drink-served-outside-of-the-home).
- 43  
44  
45 339 9. Urban LE, Lichtenstein AH, Gary CE, et al. The energy content of restaurant foods  
46  
47 340 without stated calorie information. *JAMA Intern Med* 2013; **173**(14): 1292-9.
- 48  
49 341 10. Urban LE, Weber JL, Heyman MB, et al. Energy contents of frequently ordered  
50  
51 342 restaurant meals and comparison with human energy requirements and US Department of  
52  
53 343 Agriculture database information: a multisite randomized study. *J Acad Nutr Diet* 2016;  
54  
55 344 **116**(4): 590-8. e6.
- 56  
57  
58 345 11. Jaworowska A, M. Blackham T, Long R, et al. *Nutr Food Sci* 2014; **44**(5): 414-30.  
59  
60

- 1  
2  
3 346 12. Robinson E, Jones A, Whitelock V, R. Mead B, Haynes A. (Over)eating out at major  
4  
5 347 UK restaurant  
6  
7  
8 348 chains: observational study of energy content of main meals. *BMJ* 2018.  
9  
10 349 13. [https://www.gov.uk/government/news/plans-to-cut-excess-calorie-consumption-](https://www.gov.uk/government/news/plans-to-cut-excess-calorie-consumption-unveiled)  
11  
12 [unveiled.](https://www.gov.uk/government/news/plans-to-cut-excess-calorie-consumption-unveiled)  
13  
14 350  
15 351 14. Scourboutakos MJ, L'Abbe MR. Restaurant menus: calories, caloric density, and  
16  
17 352 serving size. *Am j prev med* 2012; **43**(3): 249-55.  
18  
19 353 15. Mintel. Mintel Market Sizes, Restaurants in UK(2017). Report accessed via  
20  
21 354 University of Liverpool Library, Liverpool, UK. March 2018.  
22  
23 355 16. Mintel. Mintel Market Sizes, Fast-food and Takeaways in UK (2016). Report  
24  
25 356 accessed via University of Liverpool Library, Liverpool, UK. Accessed 1<sup>st</sup> March 2018  
26  
27 357 17. Statista. Leading restaurant chains ranked by number of users in the United Kingdom  
28  
29 358 (UK) from 2017. 2017. Report accessed 1<sup>st</sup> March from  
30  
31 359 [https://www.statista.com/statistics/586234/restaurant-chains-usage-in-the-uk-by-number-of-](https://www.statista.com/statistics/586234/restaurant-chains-usage-in-the-uk-by-number-of-users/)  
32  
33 360 [users/](https://www.statista.com/statistics/586234/restaurant-chains-usage-in-the-uk-by-number-of-users/)  
34  
35 361 18. Statista. Leading restaurant chains ranked by number of users in the United Kingdom  
36  
37 362 (UK) from 2017. 2017. Report accessed 1<sup>st</sup> March from  
38  
39 363 [https://www.statista.com/statistics/586234/restaurant-chains-usage-in-the-uk-by-number-of-](https://www.statista.com/statistics/586234/restaurant-chains-usage-in-the-uk-by-number-of-users/)  
40  
41 364 [users/](https://www.statista.com/statistics/586234/restaurant-chains-usage-in-the-uk-by-number-of-users/)  
42  
43 365 19. PHE. Calorie reduction: the scope and ambition for action. 2018.  
44  
45 366 20. Cawley J, Susskind A, Willage B. The Impact of Information Disclosure on  
46  
47 367 Consumer Behavior: Evidence from a Randomized Field Experiment of Calorie Labels on  
48  
49 368 Restaurant Menus. National Bureau of Economic Research, 2018.  
50  
51 369 21. Auchincloss AH, Leonberg BL, Glanz K, Bellitz S, Ricchezza A, Jervis A. Nutritional  
52  
53 370 value of meals at full-service restaurant chains. *J Nutr Educ Behav* 2014; **46**(1): 75-81.  
54  
55 371 22. Urban LE, McCrory MA, Dallal GE, et al. Accuracy of Stated Energy Contents of  
56  
57 372 Restaurant Foods. *JAMA* 2011; **306**(3): 287-93.  
58  
59  
60

1  
2  
3  
4  
5  
6  
7  
8  
9  
10  
11  
12  
13  
14  
15  
16  
17  
18  
19  
20  
21  
22  
23  
24  
25  
26  
27  
28  
29  
30  
31  
32  
33  
34  
35  
36  
37  
38  
39  
40  
41  
42  
43  
44  
45  
46  
47  
48  
49  
50  
51  
52  
53  
54  
55  
56  
57  
58  
59  
60

For peer review only

Table 1. Kilocalorie content of dishes from eligible restaurant chains included in analyses

| Restaurant type | Restaurant chain name                        | N   | Starters      |                 | Sides         |                         | Desserts      |                 |
|-----------------|----------------------------------------------|-----|---------------|-----------------|---------------|-------------------------|---------------|-----------------|
|                 |                                              |     | Number        | Mean (SD) kcals | Number        | Mean (SD) kcal per dish | Number        | Mean (SD) kcals |
| Fast-food       | Burger King                                  | 39  | -             | NA              | 19            | 332.1 (136.7)           | 20            | 311.5 (153.4)   |
|                 | KFC                                          | 83  | -             | NA              | 73            | 562.9 (240.1)           | 10            | 309.5 (81.1)    |
|                 | Leon                                         | 25  | -             | NA              | 10            | 209.3 (65.0)            | 15            | 270 (81.0)      |
|                 | McDonalds                                    | 23  | -             | NA              | 6             | 216.3 (167.1)           | 17            | 242 (115.5)     |
|                 | Subway                                       | 5   | -             | NA              | 1             | 705 (-)                 | 4             | 213.8 (2.2)     |
|                 | Wimpy                                        | 20  | -             | NA              | 12            | 282.2 (168.8)           | 8             | 456.3 (230.2)   |
|                 |                                              |     | -             |                 |               |                         |               |                 |
|                 | Fast-food restaurants (N=6) <sup>b</sup>     | 195 | -             | NA              | 121           | 453.6 (249.7)           | 74            | 297.2 (142.4)   |
|                 | n (%) >600kcal                               | NA  | -             | NA              | 40 (33.1)     |                         | 3 (4.1)       |                 |
| Full-service    | all bar one                                  | 11  | -             | NA              | 6             | 447.7 (140.0)           | 5             | 587.2 (222.6)   |
|                 | Ask                                          | 89  | 27            | 565.7 (278.0)   | 9             | 315.2 (336.1)           | 53            | 273.2 (137.3)   |
|                 | Bills                                        | 33  | 19            | 318.9 (123.4)   | 5             | 265.4 (161.7)           | 9             | 535.4 (298.2)   |
|                 | Chef and Brewer                              | 39  | 8             | 481.1 (124.8)   | 13            | 302.6 (213.4)           | 18            | 486.1 (300.3)   |
|                 | Ember Inns                                   | 29  | 7             | 307.6 (102.9)   | 8             | 206.1 (135.2)           | 14            | 522.2 (135.1)   |
|                 | Flaming Grill                                | 26  | 4             | 644.8 (111.4)   | 14            | 459.4 (233.9)           | 8             | 767.1 (343.7)   |
|                 | Harvester                                    | 34  | 14            | 424.5 (119.2)   | 9             | 254 (148.7)             | 11            | 670.9 (156.2)   |
|                 | Hungry horse                                 | 44  | 18            | 660.2 (247.5)   | 16            | 454.3 (280.0)           | 10            | 867.9 (517.6)   |
|                 | JD Wetherspoons                              | 24  | -             | NA              | 14            | 406.1 (325.9)           | 10            | 571.3 (169.3)   |
|                 | Nando's                                      | 40  | 6             | 486 (265.5)     | 24            | 365 (320.7)             | 10            | 330 (217.4)     |
|                 | Old English Inn                              | 87  | 11            | 433.5 (199.6)   | 10            | 364.4 (209.4)           | 66            | 408.3 (141.5)   |
|                 | Pizza Express                                | 49  | 11            | 379.5 (196.4)   | 3             | 328.7 (126.0)           | 35            | 467.8 (97.9)    |
|                 | Pizza Hut                                    | 18  | 11            | 463.6 (107.7)   | 4             | 412.5 (158.2)           | 3             | 624.7 (82.7)    |
|                 | Sizzling Pubs                                | 36  | 13            | 477.7 (167.0)   | 10            | 391.6 (227.4)           | 13            | 723.5 (210.8)   |
|                 | Slug and Lettuce                             | 17  | -             | NA              | 7             | 754 (656.4)             | 9             | 400.9 (147.7)   |
|                 | Stone house                                  | 33  | 18            | 622.6 (329.9)   | 2             | 88 (26.9)               | 13            | 686.4 (230.0)   |
|                 | Table Table                                  | 30  | 9             | 455.9 (154.4)   | 12            | 303.3 (159.7)           | 9             | 519.3 (223.1)   |
|                 | Toby's Carvery                               | 33  | 10            | 423.3 (134.3)   | -             | -                       | 23            | 671.5 (251.2)   |
| Vintage Inns    | 27                                           | 9   | 357.7 (271.9) | 8               | 239.5 (206.7) | 10                      | 738.9 (345.9) |                 |
| Wagamama        | 35                                           | -   | NA            | 21              | 326 (120.1)   | 14                      | 354 (115.8)   |                 |
| Zizzi           | 81                                           | 17  | 575.6 (155.1) | 1               | 222 (-)       | 63                      | 246.5 (150.0) |                 |
|                 |                                              |     |               |                 |               |                         |               |                 |
|                 | Full-service restaurants (N=21) <sup>b</sup> | 815 | 212           | 488 (227.7)     | 196           | 362.9 (270.0)           | 406           | 430.5 (251.3)   |
|                 | n (%) >600kcal                               |     | 56 (26.4)     |                 | 29 (14.8)     |                         | 95 (23.4)     |                 |

1  
2  
3       <sup>b</sup> For descriptive purposes, values in this row represent the mean (SD) of individual restaurant  
4  
5 values for mean kcals per dish  
6

7  
8       - indicates absence of dish from restaurant chain menu  
9

10  
11  
12  
13  
14  
15  
16  
17  
18  
19  
20  
21  
22  
23  
24  
25  
26  
27  
28  
29  
30  
31  
32  
33  
34  
35  
36  
37  
38  
39  
40  
41  
42  
43  
44  
45  
46  
47  
48  
49  
50  
51  
52  
53  
54  
55  
56  
57  
58  
59  
60

For peer review only

Table 2. Kilocalorie content of chips/fries and ice-cream dishes from eligible restaurant chains included in analyses

| Restaurant chain                 | N  | Chips/Fries                |     | Ice-cream                  |  |
|----------------------------------|----|----------------------------|-----|----------------------------|--|
|                                  |    | Mean kcal per serving (SD) | N   | Mean kcal per serving (SD) |  |
| Burger King                      | 4  | 342.5 (113.2)              | 6   | 168.3 (80.6)               |  |
| KFC                              | 2  | 372.5 (95.5)               | 4   | 253.8 (94.2)               |  |
| Leon                             | 2  | 174.0 (-)                  | -   | -                          |  |
| McDonalds                        | 3  | 339.3 (103.5)              | 10  | 211.0 (76.6)               |  |
| Subway                           | -  | -                          | -   | -                          |  |
| Wimpy                            | 2  | 267.5 (0.7)                | 4   | 397.3 (252.5)              |  |
| Fast-food chains <sup>b</sup>    | 13 | 308.9 (101.7)              | 24  | 238.5 (138.6)              |  |
| All bar one                      | 1  | 505.0 (-)                  | -   | -                          |  |
| Ask                              | -  | -                          | 17  | 268.8 (71.4)               |  |
| Bills                            | 2  | 429.5 (113.8)              | 1   | 107.0 (-)                  |  |
| Chef and Brewer                  | 3  | 478.7 (133.5)              | 1   | 951.0 (-)                  |  |
| Ember Inns                       | -  | -                          | 1   | 338.0 (-)                  |  |
| Flaming Grill                    | 1  | 546.0 (-)                  | 1   | 1421.0 (-)                 |  |
| Harvester                        | 2  | 469.5 (47.4)               | -   | -                          |  |
| Hungry horse                     | 3  | 530 (112.9)                | 3   | 1223.7 (903)               |  |
| JD Wetherspoons                  | 1  | 955.0 (-)                  | -   | -                          |  |
| Nando's                          | 3  | 680.3 (503.8)              | 4   | 140.5 (28.5)               |  |
| Old English Inn                  | 1  | 764.0 (-)                  | 12  | 498.5 (197.1)              |  |
| Pizza Express                    | -  | -                          | -   | -                          |  |
| Pizza Hut                        | 2  | 493.5 (195.9)              | 21  | 438.0 (79.8)               |  |
| Sizzling Pubs                    | 1  | 503.0 (-)                  | 5   | 688.8 (286)                |  |
| Slug and Lettuce                 | 1  | 1187.0 (-)                 | -   | -                          |  |
| Stone house                      | 1  | 107.0 (-)                  | 1   | 800.0 (-)                  |  |
| Table Table                      | 3  | 347.3 (17.2)               | 3   | 444.3 (263.6)              |  |
| Toby's Carvery                   | -  | -                          | 4   | 559 (147.2)                |  |
| Vintage Inns                     | 2  | 493.5 (13.4)               | -   | -                          |  |
| Wagamama                         | -  | -                          | 6   | 388.5 (104.6)              |  |
| Zizzi                            | -  | -                          | 24  | 266.9 (147.4)              |  |
| Full-service chains <sup>b</sup> | 27 | 535.1 (254.1)              | 104 | 416.8 (289.2)              |  |

<sup>b</sup> For descriptive purposes, values in this row represent the mean (SD) of individual restaurant values for mean chips/fries dishes kcals and mean ice-creams dishes kcals

1  
2  
3  
4  
5 - indicates absence of dish from restaurant chain menu  
6  
7

8 (-) indicates absence of SD as only one eligible dish from restaurant  
9  
10  
11  
12  
13  
14  
15  
16  
17  
18  
19  
20  
21  
22  
23  
24  
25  
26  
27  
28  
29  
30  
31  
32  
33  
34  
35  
36  
37  
38  
39  
40  
41  
42  
43  
44  
45  
46  
47  
48  
49  
50  
51  
52  
53  
54  
55  
56  
57  
58  
59  
60

For peer review only

# BMJ Open

## A bit or a lot on the side? An observational study of the energy content of starters, sides and desserts in major UK restaurant chains

|                                 |                                                                                                                                                                                                                                                                                                                                                                                                                                                                                                                               |
|---------------------------------|-------------------------------------------------------------------------------------------------------------------------------------------------------------------------------------------------------------------------------------------------------------------------------------------------------------------------------------------------------------------------------------------------------------------------------------------------------------------------------------------------------------------------------|
| Journal:                        | <i>BMJ Open</i>                                                                                                                                                                                                                                                                                                                                                                                                                                                                                                               |
| Manuscript ID                   | bmjopen-2019-029679.R1                                                                                                                                                                                                                                                                                                                                                                                                                                                                                                        |
| Article Type:                   | Original research                                                                                                                                                                                                                                                                                                                                                                                                                                                                                                             |
| Date Submitted by the Author:   | 07-Aug-2019                                                                                                                                                                                                                                                                                                                                                                                                                                                                                                                   |
| Complete List of Authors:       | Muc, Magdalena; University of Liverpool, Department of Psychological Sciences<br>Jones, Andrew; University of Liverpool, Department of Psychological Sciences<br>Roberts, Carl; Institute of Psychology, Health and Society, University of Liverpool, UK, Department of Psychological Sciences,<br>Sheen, Florence; University of Liverpool<br>Haynes, Ashleigh ; University of Liverpool<br>Robinson, Eric ; Institute of Psychology, Health and Society, University of Liverpool, UK, Department of Psychological Sciences, |
| <b>Primary Subject Heading</b>: | Health policy                                                                                                                                                                                                                                                                                                                                                                                                                                                                                                                 |
| Secondary Subject Heading:      | Public health                                                                                                                                                                                                                                                                                                                                                                                                                                                                                                                 |
| Keywords:                       | food environment, eating out, restaurant food, kilocalories, obesity                                                                                                                                                                                                                                                                                                                                                                                                                                                          |
|                                 |                                                                                                                                                                                                                                                                                                                                                                                                                                                                                                                               |

SCHOLARONE™  
Manuscripts



1  
2  
3  
4 1 A bit or a lot on the side? An observational study of the  
5  
6  
7 2 energy content of starters, sides and desserts in major UK  
8  
9  
10 3 restaurant chains  
11  
12  
13  
14  
15 4  
16  
17  
18  
19 5  
20  
21 6  
22

23 7 Magdalena Muc<sup>1</sup>, Andrew Jones<sup>1</sup>, Carl Alexander Roberts<sup>1</sup>, Florence Sheen<sup>1</sup>, Ashleigh  
24  
25 8 Haynes<sup>1</sup> & Eric Robinson<sup>1</sup>  
26  
27  
28 9

30 10 <sup>1</sup> Department of Psychological Sciences, University of Liverpool, L69 7ZA, UK  
31  
32 11

34 12 Correspondence: Eric Robinson, Department of Psychological Sciences, University of  
35  
36  
37 13 Liverpool, L69 7ZA, UK. Email: [eric.robinson@liv.ac.uk](mailto:eric.robinson@liv.ac.uk)  
38

39 14 Magdalena Muc, Institute of Psychology, Health & Society, University of Liverpool, L69 7ZA,  
40  
41 15 UK. Email: [mmuc@liverpool.ac.uk](mailto:mmuc@liverpool.ac.uk)  
42  
43  
44 16  
45  
46 17  
47  
48 18  
49

50 19 **Total word count:** 3598  
51

53 20 **Key words:** food environment; eating out; restaurant food; kilocalories; obesity  
54  
55  
56 21  
57  
58  
59  
60

1  
2  
3 22 **Abstract**

4  
5 23 Objectives: Our objective was to examine the kilocalorie (kcal) content of starters, sides and  
6  
7 24 desserts served in major UK restaurant chains, comparing the kcal content of these dishes in  
8  
9 25 fast-food and full-service restaurants.

10  
11  
12 26 Design: Observational study.

13  
14 27 Setting: Menu and nutritional information provided online by major UK restaurant chains.

15  
16 28 Method: During October to November 2018, we accessed websites of restaurant chains with  
17  
18 29 50 or more outlets in the UK. Menu items that constituted starters, sides or desserts were  
19  
20 30 identified and their kcal content was extracted. Accompanying beverages were not included.

21  
22 31 We used multilevel modelling to examine whether mean kcal content of dishes differed in  
23  
24 32 fast-food vs. full-service restaurants.

25  
26 33 Main outcome measures: The mean kcal content of dishes and the proportion of dishes  
27  
28 34 exceeding public health recommendations for energy content in a main meal (>600kcal).

29  
30 35 Results: A total of 1009 dishes (212 starters, 318 sides and 479 desserts) from 27 restaurant  
31  
32 36 chains (21 full-service, 6 fast-food) were included. The mean kcal content of eligible dishes  
33  
34 37 was 488.0 (SE=15.6) for starters, 397.5 (SE=14.9) for sides and 430.6 (SE=11.5) for desserts.

35  
36 38 The percentage of dishes exceeding 600kcal was 26.4% for starters, 21.7% for sides and  
37  
38 39 20.5% for desserts. Compared to fast-food chains, desserts offered at full-service restaurants  
39  
40 40 were on average more calorific and were significantly more likely to exceed 600kcal.

41  
42 41 Conclusions: The average energy content of sides, starters and desserts sold in major UK  
43  
44 42 restaurants is high. One in four starters and one in five sides and desserts in UK chain  
45  
46 43 restaurants exceed the recommended energy intake for an entire meal.

47  
48  
49  
50  
51  
52  
53  
54 44  
55  
56  
57  
58  
59  
60

1  
2  
3 45 **Strengths and limitations of this study**  
4

- 5 46 • This is the first study of which we are aware to assess the energy content of starters,  
6  
7 sides and desserts in the UK eating out sector.  
8 47  
9  
10 48 • Our findings will be of use to future evaluations of how the out of home food sector  
11  
12 respond to voluntary or mandatory public health actions through food product  
13 49  
14 reformulation.  
15 50  
16  
17 51 • Smaller chains and independent restaurants were not included, however studies  
18  
19 indicate that chain and non-chain restaurants tend to serve highly calorific foods.  
20 52  
21  
22 53 • We could only use the nutrition data that restaurants made available, which excluded  
23  
24 several dishes from our analyses.  
25 54  
26  
27  
28  
29  
30  
31  
32  
33  
34  
35  
36  
37  
38  
39  
40  
41  
42  
43  
44  
45  
46  
47  
48  
49  
50  
51  
52  
53  
54  
55  
56  
57  
58  
59  
60

## 55 Introduction

56 Overweight and obesity are now common in most of the developed world. For example, in  
57 the UK two in three adults and one in three children are now classed as having overweight or  
58 obesity <sup>1</sup>. Although obesity is a multifactorial disease, it is clear that changes to the food  
59 environment have been a key factor driving the global obesity epidemic <sup>2,3</sup>. Eating out of the  
60 home is becoming increasingly common, with 39% of adults reporting eating out at least  
61 once a week in a recent UK study <sup>4</sup>. Eating out of the home is associated with higher energy  
62 consumption and research suggests that frequently eating out of the home is a risk factor for  
63 obesity <sup>5</sup>. The consumption of 'fast-food' meals has been widely identified as a cause for  
64 concern, due to the low nutritional quality and high energy content of meals served in these  
65 restaurants <sup>6</sup>. Because of this, the out of home food sector has now been identified as an area  
66 for public health policy intervention in the US <sup>7</sup> and UK government are currently  
67 considering similar policy action <sup>8</sup>. However, most of the research on the nutritional quality  
68 of food eaten out of the home has been conducted in North America, a region with a  
69 particularly high prevalence of obesity <sup>6,9,10</sup>. There has been little research examining the  
70 nutritional quality of food sold out of the home in the UK, although a small study of meals  
71 sold in independent small scale takeaway outlets has shown that energy content can be  
72 excessive <sup>11</sup>. In a recent study we examined the kilocalorie content of main meals sold by  
73 major restaurant chains in the UK <sup>12</sup>. We found that the average kilocalorie content of main  
74 meals was high and very few meals adhered to public health recommendations for main meal  
75 kilocalorie consumption ( $\leq 600$ kcal) recently suggested by Public Health England <sup>13</sup>.  
76 Moreover, we found that main meals sold by full-service restaurants tended to be more  
77 calorific than those sold by fast-food restaurants, which is consistent with data from North  
78 American restaurants <sup>14</sup>. However, previous research has focused on main meals and  
79 consumers eating out can be offered a choice of starters, sides and/or desserts on restaurant  
60

1  
2  
3 80 menus. The aim of the present study was to assess the average energy content of starters,  
4  
5 81 sides and desserts sold in major UK restaurant chains. Based on Robinson et al. (2018)<sup>12</sup>, we  
6  
7 82 also examined how common it was for starters, sides and desserts to exceed the amount of  
8  
9 83 calories recommended for an entire meal and whether these dishes were more calorific at full-  
10  
11 84 service, as opposed to fast-food restaurants.  
12  
13  
14

## 15 85 **Methods**

16  
17 86 This is an observational study of the energy content of menu items across large chain  
18  
19 87 restaurants in the UK. We pre-registered the study protocol and analysis plan on the Open  
20  
21 88 Science Framework ( <https://osf.io/6cfdb/>).

22  
23  
24 89 *Patient and Public Involvement.* No patients or public were involved in this study.

25  
26  
27 90 *Restaurant sampling.* Previously<sup>12</sup> we identified restaurant chains with  $\geq 50$  outlets in the  
28  
29 91 UK by consulting market reports listing restaurants with the largest number of UK outlets,  
30  
31 92 and market research ranking UK restaurant chains by annual turnover, popularity, number of  
32  
33 93 users, and numbers of outlets<sup>15-18</sup>. If the number of UK outlets was not provided on a  
34  
35 94 restaurant website, this information was requested by email.

36  
37  
38 95 *Characterising restaurant types.* As in Robinson et al. (2018)<sup>12</sup> we classified restaurant  
39  
40 96 chains as ‘fast-food’ or ‘full-service’ restaurants using the following definition of fast-food  
41  
42 97 restaurants: ‘Restaurants that primarily provide consumers with largely pre-prepared ‘quick’  
43  
44 98 meals with little or no table service, with in-store seating and in which take-away orders are  
45  
46 99 likely to account for a significant proportion of orders’. We classified full-service chains as  
47  
48 100 restaurants where consumers primarily order and are served while seated at a table<sup>19</sup>.

49  
50  
51 101 Therefore, coffee shops and take-away only outlets were not considered eligible. Previously  
52  
53 102 two researchers independently categorised each of the included restaurant as fast-food or full-  
54  
55 103 service with any disagreements resolved by a third researcher<sup>12</sup>.  
56  
57  
58  
59  
60

1  
2  
3 104 *Data sources.* To access current menus and nutritional information, two researchers visited  
4  
5 105 the restaurants' UK web pages during October and November 2018 and accessed online  
6  
7 106 versions of current menus. If a specific geographical location was required to access a  
8  
9 107 restaurant chain menu we chose London (largest city in the UK) and the first listed location.  
10  
11 108 If a restaurant only had a downloadable menu (PDF), and no website menu, we used the  
12  
13 109 former. If there were several menus (e.g. specials menus), only the 'main menu' was used for  
14  
15 110 coding. If there was no menu clearly labelled as the 'main' menu then we used the  
16  
17 111 restaurant's 'evening menu'.

18  
19  
20  
21 112 *Starters, sides, desserts menu options.* We examined the kcal content of starters, sides and  
22  
23 113 dessert menu options. We defined a starter/side/dessert item as being a menu option that is  
24  
25 114 not a main meal dish, is an individually sold food item and can be ordered on its own, as  
26  
27 115 opposed to a more specific addition to a menu item (e.g. steak sauce, ice cream toppings). We  
28  
29 116 excluded menu items that could not be ordered by all consumers (e.g. items from senior  
30  
31 117 citizens menu section, children's menu section) and excluded platters and sharers (unless the  
32  
33 118 menu indicated the number of people per serving) as we could not confidently identify what  
34  
35 119 combination of sharing menu options would constitute a starter, side or dessert for one  
36  
37 120 person. Small plates (tapas) were not eligible unless they were part of a section of the menu  
38  
39 121 that was labelled as starters, sides or desserts. We also excluded menu items with unspecified  
40  
41 122 portion size, such as "unlimited" or "bottomless" options as we would not be able to calculate  
42  
43 123 energy content. In instances in which a menu option could be customized at the request of the  
44  
45 124 patron for an additional charge (for example add extra toppings), we only extracted the  
46  
47 125 default composition of the menu option. In instances in which a menu option required a  
48  
49 126 customer to make an explicit choice (e.g. choice of topping for a starter or dessert  
50  
51 127 accompaniment), we identified all possible configurations for the item and recorded each as  
52  
53 128 an individual menu item (e.g. chocolate cake with ice cream, chocolate cake with custard). If  
54  
55  
56  
57  
58  
59  
60

1  
2  
3 129 a menu item appeared on the menu as served with a drink of choice, we excluded it as a  
4  
5 130 scoping exercise indicated that this was uncommon and our focus is on energy content of  
6  
7  
8 131 food items. Finally, to minimize effects of season, we only included options that were  
9  
10 132 available all year round and sold everyday (e.g. we excluded dishes sold only on specific  
11  
12 133 days, such as ‘soup of the day’).

14 134 Two researchers independently identified menu options from each restaurant and a third  
15  
16 135 researcher checked their eligibility according to the protocol and resolved any discrepancies  
17  
18 136 (October 2018). If menu sections were not specifically labelled as starters, sides or desserts,  
19  
20 137 researchers categorised individual menu items according to the menu section they would  
21  
22 138 typically be found under in UK restaurants. If there was a disagreement between two  
23  
24 139 researchers a third researcher made the final decision. As there was a very high number of  
25  
26 140 menu sections that were not eligible (e.g. main meals, sharers, drinks, children’s menu,  
27  
28 141 Sunday menu) researchers did not record a classification (eligible vs. not eligible) for every  
29  
30 142 item on each menu. As in Robinson et al (2018)<sup>12</sup> we used an approximated inter-coder  
31  
32 143 consistency by calculating the number of menu items deemed eligible by both researchers vs.  
33  
34 144 the number of menu items included by only one of the researchers.

35  
36 145 Because variability in menu item kcal content between restaurant types may be in part  
37  
38 146 explained by the two types of restaurant serving different types of dishes we examined  
39  
40 147 whether there were dishes that were routinely sold by both types of restaurant (e.g. side of  
41  
42 148 fries/chips, salad) and compared the average number of kcals for these dishes by restaurant  
43  
44 149 type. Since the names of the same dishes could vary between menus, coding of these items  
45  
46 150 was completed by one researcher and cross-checked by a second researcher.

47  
48 151 *Extraction of dish kcal content.* Two researchers accessed the online nutritional information  
49  
50 152 for each restaurant (November 2018) and extracted the number of kcals per menu item. A  
51  
52 153 third researcher independently cross-checked kcal extraction for accuracy.

53  
54  
55  
56  
57  
58  
59  
60

## 154 **Statistical analysis**

155 *Primary analyses – average number of kcals:* Menu items were nested within individual  
156 restaurants so we planned to use multi-level analyses (levels: menu item, restaurant) with  
157 random intercept at the restaurant level and fixed slopes. We first examined if a multi-level  
158 analysis was appropriate for starters, sides and dessert kcals separately by examining the  
159 portioning of variance attributed to differences in kcals between restaurants (between  
160 restaurant variance/ (between restaurant variance + within restaurant variance)). We  
161 examined the multilevel model fit by comparing the loglikelihood ratio statistic  
162 (loglikelihood of the multilevel model - loglikelihood of the single-level model) to a chi-  
163 squared distribution with 1 degree of freedom. We used bootstrapping (500 samples) to  
164 improve the accuracy of parameter values and reduce bias in parameter estimates. Statistical  
165 significance ( $p < .05$ ) indicated meaningful variation in kcals of menu items between  
166 restaurants and a multilevel model was used. In all statistical tests  $\alpha$  was set at .05 and we  
167 report 95% confidence intervals for significance testing. Where multilevel modelling was not  
168 appropriate we used conventional frequentist statistics, maintaining  $p < .05$  as the level of  
169 statistical significance.

170 *Secondary analyses.* Public Health England recommends that adults do not exceed 600kcal  
171 for a complete meal at lunch and dinner<sup>13</sup>. There are no specific recommendations for  
172 individual components (e.g. energy from sides) of a meal, so we examined how common it  
173 was for starters, sides and desserts to be excessive in kcal content by calculating the  
174 proportion of menu items that exceed an entire meal's worth of kcals (600kcal). We  
175 examined differences between the two restaurant types (fast-food vs. full-service) by using a  
176 multi-level binary logistic regressions when appropriate.

177

178

## **Results**



1  
2  
3 179 *Restaurants.* Fifty-two eligible restaurant chains were identified and of these 30 restaurants  
4  
5 180 had available menus and nutritional information. We requested this from the remaining  
6  
7 181 chains but only one provided this information. Because we examined main meal  
8  
9 182 accompaniments (starters, sides, desserts) we excluded four restaurants that only tended to  
10  
11 183 sell individual food items that customers choose from to form a meal (e.g. pieces of chicken,  
12  
13 184 pieces of sushi) leaving 27 restaurants in the final sample (n=6 fast-food, n=21 full-service  
14  
15 185 restaurants). See Table 1 for restaurants included.  
16  
17 186 *Menu items.* Of all the menu items identified by either of two coders (1494), the first coder  
18  
19 187 identified 74 items which were not identified by the second coder (95.1% agreement) and the  
20  
21 188 second coder identified 35 items not identified by the first coder (97.7% agreement),  
22  
23 189 indicating reasonable consistency between the two coders in identifying eligible dishes. The  
24  
25 190 items in disagreement were then reviewed by a third researcher and after these discrepancies  
26  
27 191 were resolved, the final number of eligible dishes was 1361. We were able to extract kcal  
28  
29 192 information for 1009 dishes (74.1% of eligible items) and the remaining dishes were treated  
30  
31 193 as missing data and not included in analyses. The missing information for the 25.9% of the  
32  
33 194 items was due to lack of nutritional information provided by restaurants. See Table 1 for  
34  
35 195 number of eligible dishes per restaurant.  
36  
37 196 *Mean kcal content of menu items (Table 1).* For all three groups (starters, sides and desserts)  
38  
39 197 two-level model (dishes within restaurants) was a better fit of the data than a single level  
40  
41 198 model. The variance partition coefficient; the total residual variance which is attributable to  
42  
43 199 restaurants rather than individual dishes was 14.7% (model fit:  $\chi^2(1) = 18.1, p < .001$ ) for  
44  
45 200 starters, 13.8% (model fit:  $\chi^2(1) = 35.0, p < .001$ ) for sides, and 45.0% (model fit:  $\chi^2(1) =$   
46  
47 201 197.5,  $p < .001$ ) for desserts, indicating that multi-level modelling was appropriate. In a one-  
48  
49 202 level model (for the descriptive purposes), the average number of kcals for starters was 488.0  
50  
51 203 (SE=15.6), for sides was 397.5 (SE=14.9) and for desserts was 430.6 (SE=11.5).  
52  
53  
54  
55  
56  
57  
58  
59  
60

1  
2  
3 204 Next, we used a two-level model to compare the average number of kcal in sides and in  
4  
5 205 desserts between fast-food and full-service restaurants, as there were no starters identified in  
6  
7 206 the fast-food restaurants. Type of restaurant (fast-food vs. full-service) was not a significant  
8  
9 207 predictor of kcal content for sides ( $\beta = 0.1$ ,  $SE = 2.8$  (95% CIs -5.5 to 5.6),  $p = .49$ ) indicating  
10  
11 208 that sides offered at fast-food restaurants had on average only 0.1 kcals more energy than  
12  
13 209 sides from fast-food restaurants. Desserts had on average 241.2 more kcal in full-service than  
14  
15 210 in fast-food chains ( $\beta = 241.2$ ,  $SE = 65.4$  (95% CIs 113.0 to 369.4),  $p = .001$ ) and this  
16  
17 211 difference was statistically significant.

18  
19 212 *Mean kcal content of specific dish types (Table 2).* The most common side available was  
20  
21 213 chips/fries. To compare the average kcal content of chips between the fast-food and full-  
22  
23 214 service restaurants we selected only chips/fries menu options that were made of potato, plain,  
24  
25 215 with no sauces or spices, toppings or extras and were served as sides. The inclusion criteria  
26  
27 216 resulted in 40 eligible menu items, offered in 19 restaurants (out of the 27), including five out  
28  
29 217 of six fast-food chains (n=13 items), and 14 out of 21 full-service chains (n=27 items). The  
30  
31 218 small number of items eligible for this sub-analysis did not lend itself to multilevel analysis  
32  
33 219 so we used Welch's t-test to compare the types of restaurants. The average number of kcals  
34  
35 220 was 441.9 (SE=33.1) across all restaurants. Chips/fries in full-service restaurants had on  
36  
37 221 average 197.0 kcals more than in fast-food restaurants (505.9 kcal vs 308.9kcal) and this  
38  
39 222 difference was statistically significant ( $t(38) = 3.9$ ,  $p < .01$ ,  $d = 1.2$ ). Ice-cream dishes were  
40  
41 223 the most frequently served dessert across restaurants. We selected only ice-creams made of  
42  
43 224 dairy cream, therefore items such as sorbets, vegan ice creams (or combinations of flavours  
44  
45 225 including either of these), and other desserts that included ice-cream (such as cake with ice  
46  
47 226 cream) were excluded from the comparison. Ice-creams were served in 19 out of 27  
48  
49 227 restaurants (4 of 6 fast-foods and 15 of 21 full-service), with a total of 114 items (24 in fast  
50  
51 228 foods and 90 in full-service). The average amount of kcals in ice-cream dishes was 389.2  
52  
53  
54  
55  
56  
57  
58  
59  
60

1  
2  
3 229 (SE=27.1). Full-service restaurant ice-cream dishes had on average 190.9 kcals more than  
4  
5 230 fast-food ice-cream dishes (429.4kcal vs. 238.5kcal) and this difference was statistically  
6  
7 231 significant ( $t(85) = 4.5, p < .001, d = 0.8$ ).

8  
9  
10 232 *Menu items >600kcal*. Of the 212 starters identified, 56 (26.4%) exceeded 600kcal per dish  
11  
12 233 and all starters were from full-service restaurants. Of the 318 sides, 69 (21.7 %) had  
13  
14 234 >600kcal. Multi-level logistic regression models demonstrated the proportion of sides  
15  
16 235 >600kcal was not significantly larger in fast-food restaurants compared to full service  
17  
18 236 restaurants (Wald statistic (1) = 4.32,  $p = .04$  OR = 1.52 (95% CIs: 0.14 to 16.10),  $p = .48$ ).

19  
20 237 Among the 479 identified desserts, 98 (20.5 %) exceeded 600kcal. A multi-level logistic  
21  
22 238 regression model demonstrated that the proportion of desserts exceeding the 600kcal was 14  
23  
24 239 times larger in full-service compared to fast food restaurants (Wald statistic (1) = 7.7,  $p < .01$ ;  
25  
26 240 OR = 14.01 (95% CIs 1.95 to 101.49),  $p < .01$ ).

27  
28  
29  
30  
31  
32 241

## 35 242 Discussion

36  
37 243 The present study examined the energy content of starters, sides and desserts sold by major  
38  
39 244 UK restaurant chains. We found that the average number of kilocalories in starters, sides and  
40  
41 245 desserts was 488.0 (SE=15.6), 397.5 (SE=14.9) and 430.6 (SE=11.5) kilocalories  
42  
43 246 respectively. We also examined the proportion of these dishes that we deemed to be  
44  
45 247 'excessive' by identifying those with more than 600 kilocalories; the recommended  
46  
47 248 kilocalorie content of a full lunch or dinner meal in the UK<sup>20</sup>. We identified that one in four  
48  
49 249 starters and one in five sides and desserts exceeded the amount of energy recommended for a  
50  
51 250 full meal. Results also indicated that kilocalorie content of dishes was associated with  
52  
53 251 restaurant type. When comparing types of restaurants, we found that desserts were  
54  
55 252 significantly higher in kilocalories in full-service vs. fast-food restaurants.  
56  
57  
58  
59  
60

1  
2  
3 253  
4  
5  
6 254 Our results are in line with studies that have examined the energy content of North American  
7  
8 255 restaurant food and a recent UK study finding an excessive number of kilocalories in menu  
9  
10 256 items in the eating-out sector and a general trend for full-service restaurant menu items to on  
11  
12 257 average be more calorific than fast-food restaurants<sup>10 12 14 21-23</sup>. Based on the results from our  
13  
14  
15 258 current study and the previous UK study of main meals<sup>12</sup>, the average energy content of a  
16  
17 259 three-course meal (starter, main meal, dessert, without the addition of an extra side) in a  
18  
19 260 major chain restaurant in the UK would be approximately 1,896 kilocalories, which equates  
20  
21 261 to over three times the recommended energy intake for a main meal, and 95% of the  
22  
23 262 recommended daily consumption of kilocalories for women or 76% for men. Although  
24  
25 263 individual energy requirements vary according to levels of physical activity, age, gender, and  
26  
27 264 body mass, frequent eating out of home combined with the relatively high energy content of  
28  
29 265 restaurant dishes (including starters, sides and desserts) may contribute to excessive energy  
30  
31 266 intake that is now common in the UK and other high-income countries. The present research  
32  
33 267 has relevance to public health policy and our results also suggest that policy actions which  
34  
35 268 result in the reduction of the energy content of restaurant food are urgently needed. In  
36  
37 269 September 2018, the UK government launched an open consultation on kilocalorie labelling  
38  
39 270 for food and drink served outside of the home. As our study shows, starters, sides and  
40  
41 271 desserts can be highly calorific and, in some cases, exceed the amount of energy  
42  
43 272 recommended for a single meal. A recently published study performed two meta-analyses to  
44  
45 273 study the effect of menu energy labelling on consumer choice and the energy content of menu  
46  
47 274 items. It showed that there was a reduction in kilocalories ordered by consumers and a  
48  
49 275 reduction in energy content of menu items provided by restaurants when the energy content  
50  
51 276 of meals was displayed at the point-of-choice.<sup>24</sup> Thus, this research supports the proposition  
52  
53 277 that menu labelling may benefit public health through two main channels; industry  
54  
55  
56  
57  
58  
59  
60

1  
2  
3 278 reformulation and individual behaviour change.<sup>25</sup> Given that kilocalorie labelling is only  
4  
5 279 likely to have a small effect on daily energy intake, a combination of this and other  
6  
7  
8 280 population-wide interventions will be required to improve diet and reduce obesity.  
9

10 281  
11  
12 282 We also found a high degree of variability in kilocalorie content in similar dishes across  
13  
14 283 restaurants, which may make it difficult for consumers to estimate energy content without  
15  
16 284 access to nutritional information. For example, the most calorific portion of chips/fries  
17  
18 285 offered in studied restaurant chains had nearly 12 times more than the least calorific (107kcal  
19  
20 286 and 1256kcal) and it was common for ice-cream desserts to vary dramatically in kilocalorie  
21  
22 287 content. Although due to the methodological challenges, we did not include smaller chains or  
23  
24 288 independent restaurants in our study, evidence from US studies suggests that both chain and  
25  
26 289 non-chain restaurants tend to serve highly calorific foods<sup>10</sup>. Therefore, mandatory  
27  
28 290 kilocalorie labelling in the UK out of home food sector would be appropriate. The present  
29  
30 291 study is the first of which we are aware of that assesses the energy content of starters, sides  
31  
32 292 and desserts in the UK eating out sector, and the results may be of use to future evaluations of  
33  
34 293 how the out of home food sector respond to voluntary or mandatory public health actions  
35  
36 294 through food product reformulation.  
37  
38  
39  
40  
41  
42  
43  
44

#### 45 296 *Limitations*

46  
47 297 As there are no guidelines for the limits of calories in different courses of the meal, we  
48  
49 298 examined the proportion of meals exceeding Public Health England's recommendation of  
50  
51 299 600 kcals or less per entire meal (lunch or dinner). A further limitation of the study was that  
52  
53 300 we were only able to make use of nutrition data from restaurants that made this information  
54  
55 301 available, which excluded several dishes and restaurants from our analyses. This presents a  
56  
57 302 potential source of bias if the kilocalorie content of restaurants that do not provide nutrition  
58  
59  
60

1  
2  
3 303 information differs to that of restaurants that do. It is also possible that restaurant-provided  
4  
5 304 nutrition information is inaccurate, although research suggests that any inaccuracy may be  
6  
7  
8 305 relatively small <sup>26</sup>.  
9

306

### 307 *Conclusions*

308 The energy content of sides, starters and desserts sold in major UK restaurants is high. One in  
309 four starters and one in five sides and desserts in UK chain restaurants exceed the  
310 recommended energy intake for an entire meal.  
311

312

### 312 **Data Sharing**

313 The final data sets containing restaurant dishes' descriptions and number of kcals for each  
314 restaurant used in analyses are available online at <https://osf.io/cd597/>  
315

316

### 316 **Funding**

317 The MRC (MR/N00218/1) part fund ER's salary. The views expressed in this publication are  
318 those of the authors and not necessarily those of the MRC.  
319

320

### 320 **Competing interests**

321 All authors have completed the ICMJE uniform disclosure form at  
322 [www.icmje.org/coi\\_disclosure.pdf](http://www.icmje.org/coi_disclosure.pdf). ER has been a named investigator on research projects  
323  
324  
325  
326  
327  
328  
329  
330

1  
2  
3 323 funded by the American Beverage Association but does not consider this funding a conflict of  
4  
5 324 interest.

6  
7  
8  
9 325

10  
11  
12 326 **Author statement and Contribution**

13  
14  
15  
16 327 ER and MM designed the study. MM, CR, FS contributed to data collection. AH provided an  
17  
18 328 advice and expertise at all stages and helped solving eligibility disagreements. AJ and MM  
19  
20 329 were responsible for data analysis. MM was responsible for initial drafting of the paper and  
21  
22 330 all authors approved the manuscript and had full access to the data.

23  
24  
25 331

26  
27 332 **Ethical approval**

28  
29 333 As the study involved no human or animal participants and made use of publicly available  
30  
31 334 information ethical approval was not required

32  
33  
34 335

35  
36 336 **Transparency**

37  
38  
39 337 MM acts as the guarantor for this work and confirms that the manuscript is an accurate,  
40  
41 338 transparent and honest account of the study, that no important aspects of the study have been  
42  
43 339 omitted and that any discrepancies from the study as planned have been explained.

44  
45  
46 340

47  
48  
49 341 **References**

- 50  
51 342 1. Health matters: obesity and the food environment. 2018.  
52  
53 343 [https://www.gov.uk/government/publications/health-matters-obesity-and-the-food-](https://www.gov.uk/government/publications/health-matters-obesity-and-the-food-environment/health-matters-obesity-and-the-food-environment--2)  
54  
55 344 [environment/health-matters-obesity-and-the-food-environment--2.](https://www.gov.uk/government/publications/health-matters-obesity-and-the-food-environment/health-matters-obesity-and-the-food-environment--2)  
56  
57  
58  
59  
60

- 1  
2  
3 345 2. Livingstone MBE, Pourshahidi LK. Portion Size and Obesity. *Adv Nutr* 2014; **5**(6):  
4  
5 346 829-34.
- 6  
7  
8 347 3. MacKay S. Legislative solutions to unhealthy eating and obesity in Australia. *Public*  
9  
10 348 *Health* 2011; **125**(12): 896-904.
- 11  
12 349 4. Adams J, Goffe L, Brown T, et al. Frequency and socio-demographic correlates of  
13  
14 350 eating meals out and take-away meals at home: cross-sectional analysis of the UK national  
15  
16 351 diet and nutrition survey, waves 1–4 (2008–12). *Int J Behav Nutr Phys Act* 2015; **12**(1): 51.
- 17  
18  
19 352 5. Bowman SA, Vinyard BT. Fast Food Consumption of U.S. Adults: Impact on Energy  
20  
21 353 and Nutrient Intakes and Overweight Status: *J Am Coll Nutr*. 23 (2) (pp 163-168), 2004. Date  
22  
23 354 of Publication: April 2004.; 2004.
- 24  
25  
26 355 6. Bauer KW, Hearst MO, Earnest AA, French SA, Oakes JM, Harnack LJ. Energy  
27  
28 356 content of U.S. fast-food restaurant offerings: 14-year trends. *Am J Prev Med* 2012; **43**(5):  
29  
30 357 490-7.
- 31  
32  
33 358 7. Rubin R. Will Posting Nutritional Information on Menus Prod Diners to Make  
34  
35 359 Healthier Choices? *JAMA* 2018; **319**(19): 1969-71.
- 36  
37  
38 360 8. Calorie labelling for food and drink served outside of the home. 2018.  
39  
40 361 <https://www.gov.uk/government/consultations/calorie-labelling-for-food-and-drink-served->  
41  
42 362 [outside-of-the-home](https://www.gov.uk/government/consultations/calorie-labelling-for-food-and-drink-served-outside-of-the-home).
- 43  
44  
45 363 9. Urban LE, Lichtenstein AH, Gary CE, et al. The energy content of restaurant foods  
46  
47 364 without stated calorie information. *JAMA Intern Med* 2013; **173**(14): 1292-9.
- 48  
49 365 10. Urban LE, Weber JL, Heyman MB, et al. Energy contents of frequently ordered  
50  
51 366 restaurant meals and comparison with human energy requirements and US Department of  
52  
53 367 Agriculture database information: a multisite randomized study. *J Acad Nutr Diet* 2016;  
54  
55 368 **116**(4): 590-8. e6.
- 56  
57  
58 369 11. Jaworowska A, M. Blackham T, Long R, et al. *Nutr Food Sci* 2014; **44**(5): 414-30.  
59  
60



- 1  
2  
3 370 12. Robinson E, Jones A, Whitelock V, R. Mead B, Haynes A. (Over)eating out at major  
4  
5 371 UK restaurant  
6  
7  
8 372 chains: observational study of energy content of main meals. *BMJ* 2018.  
9  
10 373 13. [https://www.gov.uk/government/news/plans-to-cut-excess-calorie-consumption-](https://www.gov.uk/government/news/plans-to-cut-excess-calorie-consumption-unveiled)  
11  
12 [unveiled.](https://www.gov.uk/government/news/plans-to-cut-excess-calorie-consumption-unveiled)  
13 374  
14  
15 375 14. Scourboutakos MJ, L'Abbe MR. Restaurant menus: calories, caloric density, and  
16  
17 376 serving size. *Am j prev med* 2012; **43**(3): 249-55.  
18  
19 377 15. Mintel. Mintel Market Sizes, Restaurants in UK(2017). Report accessed via  
20  
21 378 University of Liverpool Library, Liverpool, UK. March 2018.  
22  
23 379 16. Mintel. Mintel Market Sizes, Fast-food and Takeaways in UK (2016). Report  
24  
25 380 accessed via University of Liverpool Library, Liverpool, UK. Accessed 1<sup>st</sup> March 2018  
26  
27 381 17. Statista. Leading restaurant chains ranked by number of users in the United Kingdom  
28  
29 382 (UK) from 2017. 2017. Report accessed 1<sup>st</sup> March from  
30  
31 383 [https://www.statista.com/statistics/586234/restaurant-chains-usage-in-the-uk-by-number-of-](https://www.statista.com/statistics/586234/restaurant-chains-usage-in-the-uk-by-number-of-users/)  
32  
33 [users/](https://www.statista.com/statistics/586234/restaurant-chains-usage-in-the-uk-by-number-of-users/)  
34 384  
35  
36 385 18. Statista. Leading restaurant chains ranked by number of users in the United Kingdom  
37  
38 386 (UK) from 2017. 2017. Report accessed 1<sup>st</sup> March from  
39  
40 387 [https://www.statista.com/statistics/586234/restaurant-chains-usage-in-the-uk-by-number-of-](https://www.statista.com/statistics/586234/restaurant-chains-usage-in-the-uk-by-number-of-users/)  
41  
42 [users/](https://www.statista.com/statistics/586234/restaurant-chains-usage-in-the-uk-by-number-of-users/)  
43 388  
44  
45 389 19. Mazidi M, State Key Laboratory of Molecular Developmental Biology IoGaDB,  
46  
47 390 Chinese Academy of Sciences, Chaoyang, Beijing, China, University of the Chinese  
48  
49 391 Academy of Sciences H, Beijing, China, et al. Higher densities of fast-food and full-service  
50  
51 392 restaurants are not associated with obesity prevalence. *AJCN* 2019;**106**(2):603-13. doi:  
52  
53 393 10.3945/ajcn.116.151407  
54  
55 394 20. PHE. Calorie reduction: the scope and ambition for action. 2018.  
56  
57  
58  
59  
60

- 1  
2  
3 395 21. Bleich SN, Wolfson JA, Jarlenski MP, Block JP. Restaurants with calories displayed  
4  
5 396 on menus had lower calorie counts compared to restaurants without such labels. *Health aff.*  
6  
7 397 2015 Nov 1;**34**(11):1877-84.
- 8  
9 398 22. Auchincloss AH, Leonberg BL, Glanz K, Bellitz S, Ricchezza A, Jervis A. Nutritional  
10  
11 399 value of meals at full-service restaurant chains. *J Nutr Educ Behav* 2014; **46**(1): 75-81.
- 12  
13 400 23. Schoffman DE, Davidson CR, Hales SB, et al. The Fast-Casual Conundrum: Fast-  
14  
15 401 Casual Restaurant Entrees Are Higher in Calories than Fast Food. *J Acad Nutr Diet*  
16  
17 402 2016;**116**(10):1606-12. doi: 10.1016/j.jand.2016.03.020 [published Online First: 2016/05/18]
- 18  
19 403 24. Zlatevska N, Neumann N, Dubelaar C. Mandatory Calorie Disclosure: A  
20  
21 404 Comprehensive Analysis of Its Effect on Consumers and Retailers. *Journal of Retailing*  
22  
23 405 2018;Volume **94**(Issue 1):89-101. doi: <https://doi.org/10.1016/j.jretai.2017.09.007>
- 24  
25 406 25. Roberts S, Pilard L, Chen J, et al. Efficacy of population-wide diabetes and obesity  
26  
27 407 prevention programs: An overview of systematic reviews on proximal, intermediate, and  
28  
29 408 distal outcomes and a meta-analysis of impact on BMI. *Obes Rev* 2019;**20**(7):947-63. doi:  
30  
31 409 10.1111/obr.12821 [published Online First: 2019/05/01]
- 32  
33 410 26. Urban LE, McCrory MA, Dallal GE, et al. Accuracy of Stated Energy Contents of  
34  
35 411 Restaurant Foods. *JAMA* 2011; **306**(3): 287-93.
- 36  
37  
38  
39  
40  
41  
42  
43  
44  
45  
46  
47  
48  
49  
50  
51  
52  
53  
54  
55  
56  
57  
58  
59  
60

Table 1. Kilocalorie content of dishes from eligible restaurant chains included in analyses

| Restaurant type             | Restaurant chain name                        | N   | Starters      |                 | Sides         |                         | Desserts      |                 |
|-----------------------------|----------------------------------------------|-----|---------------|-----------------|---------------|-------------------------|---------------|-----------------|
|                             |                                              |     | Number        | Mean (SD) kcals | Number        | Mean (SD) kcal per dish | Number        | Mean (SD) kcals |
| Fast-food                   | Burger King                                  | 39  | -             | NA              | 19            | 332.1 (136.7)           | 20            | 311.5 (153.4)   |
|                             | KFC                                          | 83  | -             | NA              | 73            | 562.9 (240.1)           | 10            | 309.5 (81.1)    |
|                             | Leon                                         | 25  | -             | NA              | 10            | 209.3 (65.0)            | 15            | 270.0 (81.0)    |
|                             | McDonalds                                    | 23  | -             | NA              | 6             | 216.3 (167.1)           | 17            | 242.0 (115.5)   |
|                             | Subway                                       | 5   | -             | NA              | 1             | 705.0 (-)               | 4             | 213.8 (2.2)     |
|                             | Wimpy                                        | 20  | -             | NA              | 12            | 282.2 (168.8)           | 8             | 456.3 (230.2)   |
|                             |                                              |     |               |                 |               |                         |               |                 |
|                             | All fast-food restaurants (N=6) <sup>a</sup> | 195 | -             | NA              | 121           | 453.6 (249.7)           | 74            | 297.2 (142.4)   |
| n (%) >600kcal <sup>b</sup> | NA                                           | -   | NA            | 40 (33.1)       |               | 3 (4.1)                 |               |                 |
| Full-service                | all bar one                                  | 11  | -             | NA              | 6             | 447.7 (140.0)           | 5             | 587.2 (222.6)   |
|                             | Ask                                          | 89  | 27            | 565.7 (278.0)   | 9             | 315.2 (336.1)           | 53            | 273.2 (137.3)   |
|                             | Bills                                        | 33  | 19            | 318.9 (123.4)   | 5             | 265.4 (161.7)           | 9             | 535.4 (298.2)   |
|                             | Chef and Brewer                              | 39  | 8             | 481.1 (124.8)   | 13            | 302.6 (213.4)           | 18            | 486.1 (300.3)   |
|                             | Ember Inns                                   | 29  | 7             | 307.6 (102.9)   | 8             | 206.1 (135.2)           | 14            | 522.2 (135.1)   |
|                             | Flaming Grill                                | 26  | 4             | 644.8 (111.4)   | 14            | 459.4 (233.9)           | 8             | 767.1 (343.7)   |
|                             | Harvester                                    | 34  | 14            | 424.5 (119.2)   | 9             | 254.0 (148.7)           | 11            | 670.9 (156.2)   |
|                             | Hungry horse                                 | 44  | 18            | 660.2 (247.5)   | 16            | 454.3 (280.0)           | 10            | 867.9 (517.6)   |
|                             | JD Wetherspoon                               | 24  | -             | NA              | 14            | 406.1 (325.9)           | 10            | 571.3 (169.3)   |
| Nando's                     | 40                                           | 6   | 486.0 (265.5) | 24              | 365.0 (320.7) | 10                      | 330.0 (217.4) |                 |

|                                     |     |           |               |           |               |           |               |
|-------------------------------------|-----|-----------|---------------|-----------|---------------|-----------|---------------|
| Old English Inn                     | 87  | 11        | 433.5 (199.6) | 10        | 364.4 (209.4) | 66        | 408.3 (141.5) |
| Pizza Express                       | 49  | 11        | 379.5 (196.4) | 3         | 328.7 (126.0) | 35        | 467.8 (97.9)  |
| Pizza Hut                           | 18  | 11        | 463.6 (107.7) | 4         | 412.5 (158.2) | 3         | 624.7 (82.7)  |
| Sizzling Pubs                       | 36  | 13        | 477.7 (167.0) | 10        | 391.6 (227.4) | 13        | 723.5 (210.8) |
| Slug and Lettuce                    | 17  | -         | NA            | 7         | 754 (656.4)   | 9         | 400.9 (147.7) |
| Stone house                         | 33  | 18        | 622.6 (329.9) | 2         | 88.0 (26.9)   | 13        | 686.4 (230.0) |
| Table Table                         | 30  | 9         | 455.9 (154.4) | 12        | 303.3 (159.7) | 9         | 519.3 (223.1) |
| Toby's Carvery                      | 33  | 10        | 423.3 (134.3) | -         | -             | 23        | 671.5 (251.2) |
| Vintage Inns                        | 27  | 9         | 357.7 (271.9) | 8         | 239.5 (206.7) | 10        | 738.9 (345.9) |
| Wagamama                            | 35  | -         | NA            | 22        | 328.1 (117.6) | 13        | 352.6 (120.4) |
| Zizzi                               | 81  | 17        | 575.6 (155.1) | 1         | 222.0 (-)     | 63        | 246.5 (150.0) |
|                                     |     |           |               |           |               |           |               |
| All full-service restaurants (N=21) | 815 | 212       | 488.0 (227.7) | 197       | 397.5 (265.3) | 405       | 430.6 (251.5) |
| n (%) >600kcal <sup>a</sup>         |     | 56 (26.4) |               | 29 (14.7) |               | 95 (23.5) |               |

<sup>a</sup> For descriptive purposes, values in this row represent the one-level mean (SD) of individual restaurant values for mean kcals per dish

<sup>b</sup> the values presented in these rows are the numbers of the dishes exceeding the 600 kcal and their representation among the total meals identified (n (%))

- indicates absence of dish from restaurant chain menu.

Table 2. Kilocalorie content of chips/fries and ice-cream dishes from eligible restaurant chains included in analyses

| Restaurant chain                       | N  | Chips/Fries                |    | Ice-cream                  |  |
|----------------------------------------|----|----------------------------|----|----------------------------|--|
|                                        |    | Mean kcal per serving (SD) | N  | Mean kcal per serving (SD) |  |
| Burger King                            | 4  | 342.5 (113.2)              | 6  | 168.3 (80.6)               |  |
| KFC                                    | 2  | 372.5 (95.5)               | 4  | 253.8 (94.2)               |  |
| Leon                                   | 2  | 174.0 (-)                  | -  | -                          |  |
| McDonalds                              | 3  | 339.3 (103.5)              | 10 | 211.0 (76.6)               |  |
| Subway                                 | -  | -                          | -  | -                          |  |
| Wimpy                                  | 2  | 267.5 (0.7)                | 4  | 397.3 (252.5)              |  |
| All fast-food restaurants <sup>a</sup> | 13 | 308.9 (101.7)              | 24 | 238.5 (138.6)              |  |
| All bar one                            | 2  | 452.0 (75.0)               | -  | -                          |  |
| Ask                                    | -  | -                          | 16 | 272.8 (72.0)               |  |
| Bills                                  | 2  | 429.5 (113.8)              | 1  | 107.0 (-)                  |  |
| Chef and Brewer                        | 3  | 478.7 (133.5)              | 1  | 951.0 (-)                  |  |
| Ember Inns                             | -  | -                          | 1  | 338.0 (-)                  |  |
| Flaming Grill                          | 1  | 546.0 (-)                  | 1  | 1421.0 (-)                 |  |
| Harvester                              | 2  | 469.5 (47.4)               | -  | -                          |  |
| Hungry horse                           | 3  | 530.0 (112.9)              | 3  | 1223.7 (903)               |  |
| JD Wetherspoon                         | 1  | 955.0 (-)                  | -  | -                          |  |
| Nando's                                | 3  | 680.3 (503.8)              | 4  | 140.5 (28.5)               |  |
| Old English Inn                        | 1  | 764.0 (-)                  | 12 | 498.5 (197.1)              |  |
| Pizza Express                          | -  | -                          | 11 | 481.1 (63.4)               |  |
| Pizza Hut                              | 2  | 493.5 (195.9)              | -  | -                          |  |
| Sizzling Pubs                          | 1  | 503.0 (-)                  | 5  | 688.8 (286)                |  |

|                                           |    |               |    |               |
|-------------------------------------------|----|---------------|----|---------------|
| Slug and Lettuce                          | -  | -             | -  | -             |
| Stone house                               | 1  | 107.0 (-)     | 1  | 800.0 (-)     |
| Table Table                               | 3  | 347.3 (17.2)  | 2  | 596.5 (9.2)   |
| Toby's Carvery                            | -  | -             | 4  | 559.0 (147.2) |
| Vintage Inns                              | 2  | 493.5 (13.4)  | -  | -             |
| Wagamama                                  | -  | -             | 5  | 412.0 (97.7)  |
| Zizzi                                     | -  | -             | 23 | 270.5 (146.7) |
| All Full-service restaurants <sup>a</sup> | 27 | 505.9 (219.2) | 90 | 429.4 (289.4) |
|                                           |    |               |    |               |

<sup>a</sup> For descriptive purposes, values in this row represent the one-level mean (SD) of individual restaurant values for mean chips/fries dishes kcals and mean ice-creams dishes kcals

- indicates absence of dish from restaurant chain menu

(-) indicates absence of SD as only one eligible dish from restaurant

STROBE Statement—Checklist of items that should be included in reports of *cross-sectional studies*

|                              | <b>Item No</b> | <b>Recommendation</b>                                                                                                                                                                                                                                                                                                                                            |
|------------------------------|----------------|------------------------------------------------------------------------------------------------------------------------------------------------------------------------------------------------------------------------------------------------------------------------------------------------------------------------------------------------------------------|
| <b>Title and abstract</b>    | 1              | (a) Indicate the study's design with a commonly used term in the title or the abstract <b><u>1, 26</u></b><br>(b) Provide in the abstract an informative and balanced summary of what was done and what was found <b><u>23-43</u></b>                                                                                                                            |
| <b>Introduction</b>          |                |                                                                                                                                                                                                                                                                                                                                                                  |
| Background/rationale         | 2              | Explain the scientific background and rationale for the investigation being reported <b><u>56-80</u></b>                                                                                                                                                                                                                                                         |
| Objectives                   | 3              | State specific objectives, including any prespecified hypotheses <b><u>80-84</u></b>                                                                                                                                                                                                                                                                             |
| <b>Methods</b>               |                |                                                                                                                                                                                                                                                                                                                                                                  |
| Study design                 | 4              | Present key elements of study design early in the paper <b><u>86-87</u></b>                                                                                                                                                                                                                                                                                      |
| Setting                      | 5              | Describe the setting, locations, and relevant dates, including periods of recruitment, exposure, follow-up, and data collection <b><u>89-92</u></b>                                                                                                                                                                                                              |
| Participants                 | 6              | (a) Give the eligibility criteria, and the sources and methods of selection of participants <b><u>NA</u></b>                                                                                                                                                                                                                                                     |
| Variables                    | 7              | Clearly define all outcomes, exposures, predictors, potential confounders, and effect modifiers. Give diagnostic criteria, if applicable <b><u>88 (pre-registered protocol), 94-151</u></b>                                                                                                                                                                      |
| Data sources/<br>measurement | 8*             | For each variable of interest, give sources of data and details of methods of assessment (measurement). Describe comparability of assessment methods if there is more than one group <b><u>94-151</u></b>                                                                                                                                                        |
| Bias                         | 9              | Describe any efforts to address potential sources of bias <b><u>100-105, 132-142, 149-151</u></b>                                                                                                                                                                                                                                                                |
| Study size                   | 10             | Explain how the study size was arrived at <b><u>184-192</u></b>                                                                                                                                                                                                                                                                                                  |
| Quantitative variables       | 11             | Explain how quantitative variables were handled in the analyses. If applicable, describe which groupings were chosen and why <b><u>194-238</u></b>                                                                                                                                                                                                               |
| Statistical methods          | 12             | (a) Describe all statistical methods, including those used to control for confounding <b><u>152-174</u></b><br>(b) Describe any methods used to examine subgroups and interactions<br>(c) Explain how missing data were addressed<br>(d) If applicable, describe analytical methods taking account of sampling strategy<br>(e) Describe any sensitivity analyses |
| <b>Results</b>               |                |                                                                                                                                                                                                                                                                                                                                                                  |
| Participants                 | 13*            | (a) Report numbers of individuals at each stage of study—eg numbers potentially eligible, examined for eligibility, confirmed eligible, included in the study, completing follow-up, and analysed <b><u>177-193</u></b><br>(b) Give reasons for non-participation at each stage<br>(c) Consider use of a flow diagram                                            |
| Descriptive data             | 14*            | (a) Give characteristics of study participants (eg demographic, clinical, social) and information on exposures and potential confounders <b><u>Table 1</u></b><br>(b) Indicate number of participants with missing data for each variable of interest <b><u>NA</u></b>                                                                                           |
| Outcome data                 | 15*            | Report numbers of outcome events or summary measures <b><u>194,210,230</u></b>                                                                                                                                                                                                                                                                                   |

|    |                          |    |                                                                                                                                                                                                                             |
|----|--------------------------|----|-----------------------------------------------------------------------------------------------------------------------------------------------------------------------------------------------------------------------------|
| 1  |                          |    |                                                                                                                                                                                                                             |
| 2  | Main results             | 16 | (a) Give unadjusted estimates and, if applicable, confounder-adjusted estimates and their precision (eg, 95% confidence interval). Make clear which confounders were adjusted for and why they were included <u>194-209</u> |
| 3  |                          |    |                                                                                                                                                                                                                             |
| 4  |                          |    |                                                                                                                                                                                                                             |
| 5  |                          |    |                                                                                                                                                                                                                             |
| 6  |                          |    | (b) Report category boundaries when continuous variables were categorized <u>168-</u>                                                                                                                                       |
| 7  |                          |    | <u>172</u>                                                                                                                                                                                                                  |
| 8  |                          |    | (c) If relevant, consider translating estimates of relative risk into absolute risk for a meaningful time period <u>NA</u>                                                                                                  |
| 9  |                          |    |                                                                                                                                                                                                                             |
| 10 |                          |    |                                                                                                                                                                                                                             |
| 11 | Other analyses           | 17 | Report other analyses done—eg analyses of subgroups and interactions, and sensitivity analyses <u>210-238</u>                                                                                                               |
| 12 |                          |    |                                                                                                                                                                                                                             |
| 13 |                          |    |                                                                                                                                                                                                                             |
| 14 | <b>Discussion</b>        |    |                                                                                                                                                                                                                             |
| 15 | Key results              | 18 | Summarise key results with reference to study objectives <u>240-250</u>                                                                                                                                                     |
| 16 | Limitations              | 19 | Discuss limitations of the study, taking into account sources of potential bias or imprecision. Discuss both direction and magnitude of any potential bias <u>294-302</u>                                                   |
| 17 |                          |    |                                                                                                                                                                                                                             |
| 18 |                          |    |                                                                                                                                                                                                                             |
| 19 | Interpretation           | 20 | Give a cautious overall interpretation of results considering objectives, limitations, multiplicity of analyses, results from similar studies, and other relevant evidence <u>252-292</u>                                   |
| 20 |                          |    |                                                                                                                                                                                                                             |
| 21 |                          |    |                                                                                                                                                                                                                             |
| 22 |                          |    |                                                                                                                                                                                                                             |
| 23 | Generalisability         | 21 | Discuss the generalisability (external validity) of the study results <u>260-278</u>                                                                                                                                        |
| 24 |                          |    |                                                                                                                                                                                                                             |
| 25 | <b>Other information</b> |    |                                                                                                                                                                                                                             |
| 26 | Funding                  | 22 | Give the source of funding and the role of the funders for the present study and, if applicable, for the original study on which the present article is based <u>314-315</u>                                                |
| 27 |                          |    |                                                                                                                                                                                                                             |
| 28 |                          |    |                                                                                                                                                                                                                             |

\*Give information separately for exposed and unexposed groups.

**Note:** An Explanation and Elaboration article discusses each checklist item and gives methodological background and published examples of transparent reporting. The STROBE checklist is best used in conjunction with this article (freely available on the Web sites of PLoS Medicine at <http://www.plosmedicine.org/>, Annals of Internal Medicine at <http://www.annals.org/>, and Epidemiology at <http://www.epidem.com/>). Information on the STROBE Initiative is available at [www.strobe-statement.org](http://www.strobe-statement.org).
